# Supplementary material
Source: publisher figshare collection journal article supplement (https://acs.figshare.com/ndownloader/files/7534525)
Supplement: Supplementary file 1 [file 7534525]

## Supporting Information

### **Dielectric Screening to Reduce Charge Transfer State Binding Energy in Organic Bulk Heterojunction Photovoltaics**

*Sibel, Leblebici\*; Jiye, Lee; Alexander, Weber-Bargioni; Biwu, Ma*

\* Sibel Leblebici  
The Molecular Foundry  
Lawrence Berkeley National Laboratory  
Berkeley, CA 94720  
Email: [s.leblebici@berkeley.edu](mailto:s.leblebici@berkeley.edu)

## Supporting Information

The exponentially modified Gaussian function used to fit the EL spectra is shown below.

$$f(x) = y_0 + \frac{A}{t_0} e^{\frac{1}{2}(\frac{w}{t_0})^2 - \frac{x-x_c}{t_0}} \int_{-\infty}^z \frac{1}{\sqrt{2\pi}} e^{-\frac{y^2}{2}} dy$$

$$\text{where } z = \frac{x - x_c}{w} - \frac{w}{t_0}$$

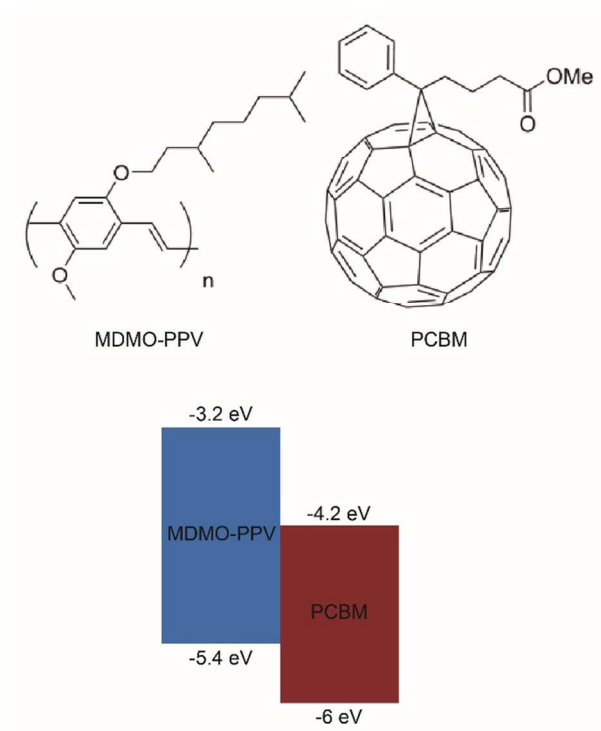

**Figure S1.** Molecular structures of MDMO-PPV and PCBM and their band alignment<sup>56</sup>.

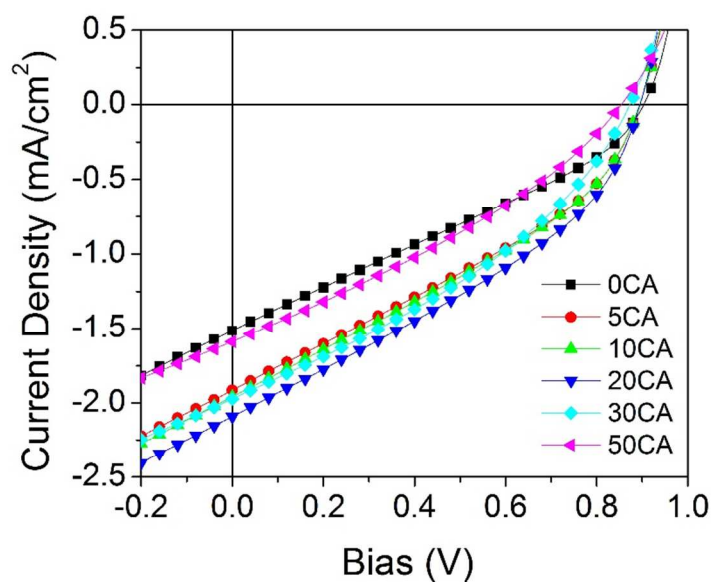

**Figure S2.** Illuminated current density-voltage curves for MDMO-PPV:PCBM:CA BHJ devices with varying concentrations of CA. The highest performing cells for each concentration are plotted. The concentrations vary from 0 to 50 wt% CA.

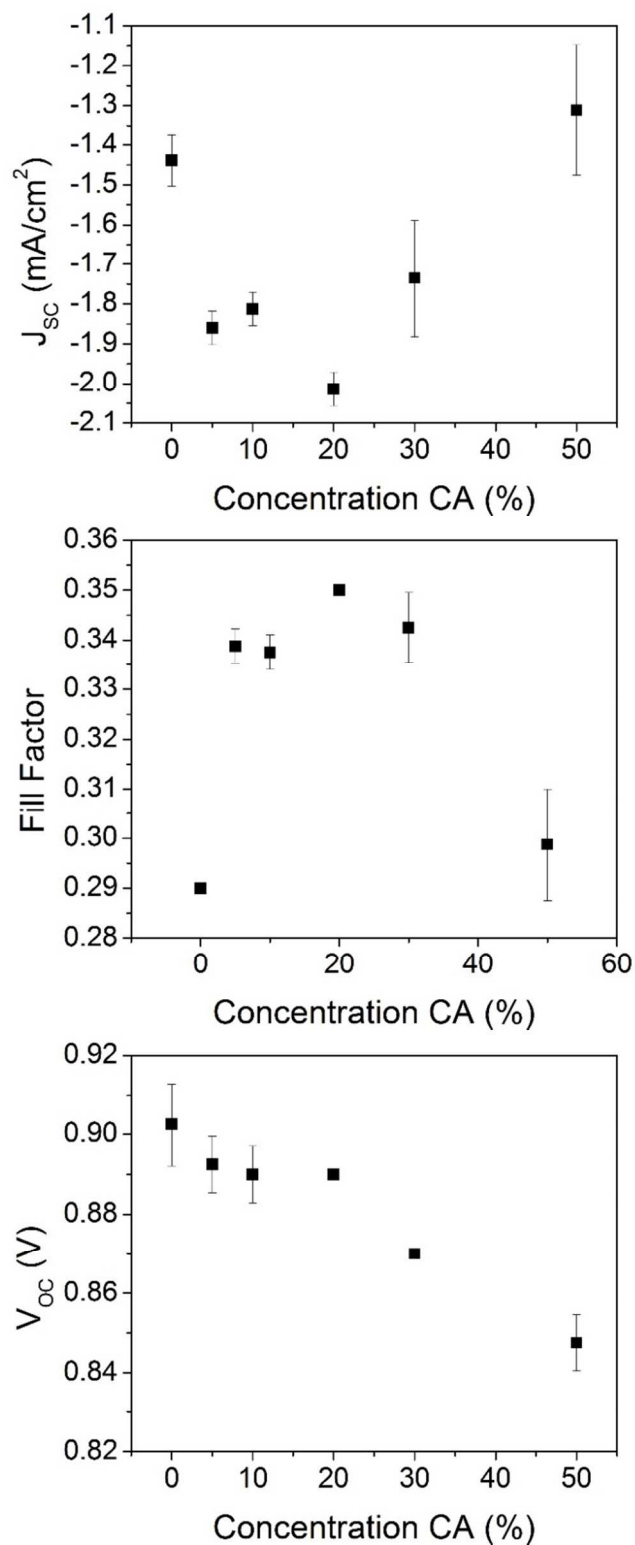

**Figure S3.** Average  $J_{sc}$ , FF, and  $V_{oc}$  of 8 devices with increasing wt% of CA blended in the BHJ. The error bars represent the standard deviation. Both FF and  $J_{sc}$  are optimized at 20 wt% CA. The  $V_{oc}$  decreases as more CA is added.

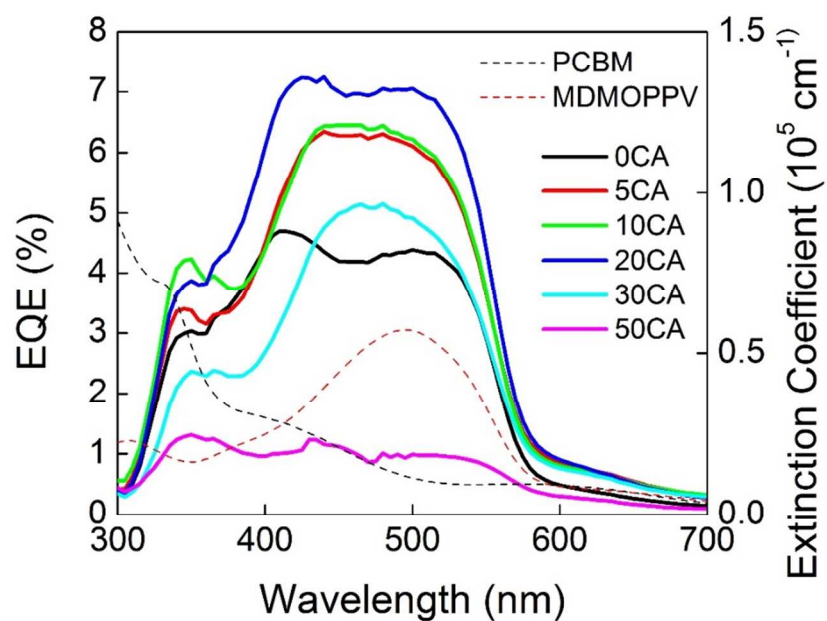

**Figure S4.** Raw external quantum efficiency (EQE) spectra of BHJ devices with CA in solid lines and extinction coefficients for MDMO-PPV and PCBM in dashed lines. The maximum EQE, across almost the entire spectrum, is achieved at 20 wt% CA.

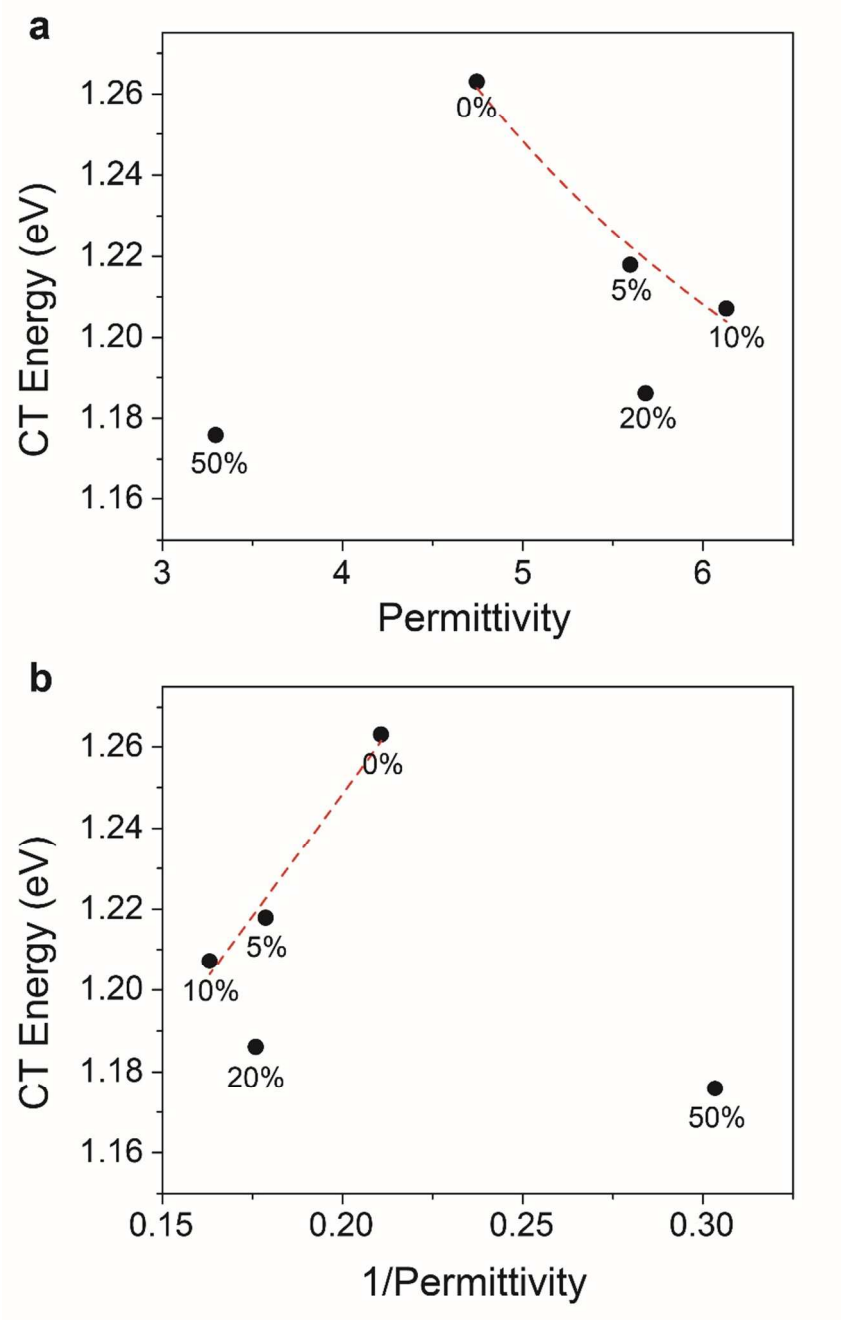

Figure S5. Fitting data to Coulombic and SSSE models. (a) CT state plotted against permittivity only shows a trend towards the SSSE behavior (dashed line) for the films with CA concentrations up to 10 wt%<sup>33</sup>. The SSSE fit is based on the equation  $E_{CT} = C - A((2(1 - \epsilon))/(2\epsilon - 1))$ , where  $E_{CT}$  is the CT state energy,  $C$  and  $A$  are constants, and  $\epsilon$  is the permittivity. (b) In the Coulombic model, the CT state energy is inversely related to the permittivity. The dashed line is a linear fit for data from films with CA concentrations up to 10 wt%. The wt% CA for each data point is labeled.
